# Supplementary material for: Cancer Statistics in Korea: Incidence, Mortality, Survival, and Prevalence in 2020
Source: PubMed Central journal article supplement — Cancer Res Treat. 2023 Mar 10;55(2):385–99. doi: 10.4143/crt.2023.447 (PMC10101796; doi:10.4143/crt.2023.447), 2023-04
Supplement: crt-2023-447-Supplementary-Table-2.pdf [file crt-2023-447-Supplementary-Table-2.pdf]

|                       |      |      |           |                    |           |                     |           |     |     |     |           |                    |           |                    |           |                    |
|-----------------------|------|------|-----------|--------------------|-----------|---------------------|-----------|-----|-----|-----|-----------|--------------------|-----------|--------------------|-----------|--------------------|
| Testis                |      |      |           |                    |           |                     |           |     |     |     |           |                    |           |                    |           |                    |
| Kidney                | 1.7  | 3.9  | 1999-2009 | 6.2 <sup>a)</sup>  | 2009-2020 | 2.2 <sup>a)</sup>   | -         | -   | 0.6 | 0.4 | 1999-2020 | -1.1 <sup>a)</sup> | -         | -                  | -         | -                  |
| Bladder               | 1.6  | 1.4  | 1999-2001 | 4.8                | 2001-2020 | -1.0 <sup>a)</sup>  | -         | -   | 0.5 | 0.4 | 1999-2001 | 11.6               | 2001-2020 | -2.0 <sup>a)</sup> | -         | -                  |
| Brain and CNS         | 2.6  | 2.4  | 1999-2020 | 0.1                | -         | -                   | -         | -   | 1.7 | 1.3 | 1999-2003 | 3.8 <sup>a)</sup>  | 2003-2008 | -4.4 <sup>a)</sup> | 2008-2020 | -0.7 <sup>a)</sup> |
| Thyroid               | 10.7 | 62.4 | 1999-2011 | 22.3 <sup>a)</sup> | 2011-2015 | -14.7 <sup>a)</sup> | 2015-2020 | 0.6 | 0.5 | 0.3 | 1999-2004 | 4.4                | 2004-2020 | -4.9 <sup>a)</sup> | -         | -                  |
| Hodgkin lymphoma      | 0.1  | 0.4  | 1999-2020 | 4.6 <sup>a)</sup>  | -         | -                   | -         | -   | 0.0 | 0.0 | 1999-2003 | 48.8               | 2003-2020 | -1.8               | -         | -                  |
| Non-Hodgkin lymphoma  | 3.3  | 5.2  | 1999-2020 | 2.6 <sup>a)</sup>  | -         | -                   | -         | -   | 1.4 | 1.2 | 1999-2020 | -0.7 <sup>a)</sup> | -         | -                  | -         | -                  |
| Multiple myeloma      | 0.8  | 1.4  | 1999-2013 | 3.9 <sup>a)</sup>  | 2013-2020 | 0.1                 | -         | -   | 0.4 | 0.6 | 1999-2005 | 9.9 <sup>a)</sup>  | 2005-2016 | 0.2                | 2016-2020 | -5.8 <sup>a)</sup> |
| Leukemia              | 4.0  | 4.8  | 1999-2020 | 0.8 <sup>a)</sup>  | -         | -                   | -         | -   | 2.4 | 1.5 | 1999-2020 | -2.1 <sup>a)</sup> | -         | -                  | -         | -                  |
| Other and ill-defined | 12.4 | 19.4 | 1999-2010 | 3.5 <sup>a)</sup>  | 2010-2020 | 1.6 <sup>a)</sup>   | -         | -   | 7.1 | 3.2 | 1999-2005 | -7.2 <sup>a)</sup> | 2005-2020 | -2.0 <sup>a)</sup> | -         | -                  |

APC, annual percentage change; CNS, central nervous system. APC was calculated using age-standardized incidence data based on the Segi's world standard population.

<sup>a)</sup>Significantly different from zero ( $p < 0.05$ ), <sup>b)</sup>Includes the gallbladder and other/unspecified parts of the biliary tract.
