# Supplementary material for: Cancer Statistics in Korea: Incidence, Mortality, Survival, and Prevalence in 2020
Source: PubMed Central journal article supplement — Cancer Res Treat. 2023 Mar 10;55(2):385–99. doi: 10.4143/crt.2023.447 (PMC10101796; doi:10.4143/crt.2023.447), 2023-04
Supplement: crt-2023-447-Supplementary-Table-5.pdf [file crt-2023-447-Supplementary-Table-5.pdf]

**S5 Table.** Trends in carcinoma *in situ* incidence rates from 1999 to 2020 in Korea, men

| Site/Type                                                        | Incidence |      |           |                    |           |                    |           |                    |
|------------------------------------------------------------------|-----------|------|-----------|--------------------|-----------|--------------------|-----------|--------------------|
|                                                                  | 199       | 2020 | Trend 1   |                    | Trend 2   |                    | Trend 3   |                    |
|                                                                  | 9         |      | Years     | APC                | Years     | APC                | Years     | APC                |
| <i>In situ</i> neoplasms                                         | 0.6       | 20.0 | 1999-2009 | 32.0 <sup>a)</sup> | 2009-2015 | 18.8 <sup>a)</sup> | 2015-2020 | 1.0                |
| Carcinoma <i>in situ</i> of stomach                              | 0.1       | 3.0  | 1999-2011 | 27.9 <sup>a)</sup> | 2011-2014 | 45.6 <sup>a)</sup> | 2014-2020 | -0.1               |
| Carcinoma <i>in situ</i> of colon, rectosigmoid junction, rectum | 0.1       | 9.1  | 1999-2009 | 46.4 <sup>a)</sup> | 2009-2015 | 23.3 <sup>a)</sup> | 2015-2020 | -2.6 <sup>a)</sup> |
| Carcinoma <i>in situ</i> of skin                                 | 0.1       | 1.0  | 1999-2010 | 19.9 <sup>a)</sup> | 2010-2020 | 7.3 <sup>a)</sup>  | -         | -                  |
| Carcinoma <i>in situ</i> of bladder                              | 0.1       | 4.3  | 1999-2009 | 35.9 <sup>a)</sup> | 2009-2020 | 6.7 <sup>a)</sup>  | -         | -                  |
| Other and ill-defined                                            | 0.3       | 2.5  | 1999-2017 | 13.8 <sup>a)</sup> | 2017-2020 | 2.8                | -         | -                  |

APC, annual percentage change. <sup>a)</sup>Significantly different from zero ( $p < 0.05$ ).
